# Supplementary material for: Comment on “An explanation for the charge on water's surface” by A. Gray-Weale and J. K. Beattie, Phys. Chem. Chem. Phys., 2009, 11, 10994
Source: Royal Society of Chemistry journal article supplement (doi:10.1039/c001492c), 2010-01-01
Supplement: c001492c.pdf [file c001492c.pdf]

## Supplementary information

The dielectric decrements were calculated using molecular dynamics simulations, employing the GROMACS program package.<sup>1</sup> Each simulated system contained 783 water molecules, 14 sodium cations, and 14 anions, corresponding to 1M solution of NaF, NaCl, and NaOH. Water was constrained with SETTLE algorithm.<sup>2</sup> Production runs of 19 ns were carried out with a 2 fs time step after 1 ns of equilibration. The system was kept at pressure of 1 atm and temperature of 300 K using the Berendsen barostat and thermostat.<sup>3</sup> Barostat scaling time was 2 ps with compressibility of  $4.5 \times 10^{-5} \text{ bar}^{-1}$ , while the thermostat time constant was set to 1.0 ps. The van der Waals and Coulomb interactions were cut-off at 1.1 nm and the long-range Coulomb interactions were accounted for using the Particle Mesh Ewald (PME) Method<sup>4</sup> with Fourier spacing grid of 0.12 nm. Details concerning calculation of free energy profiles of ions moving across the air/water interface are given in our previous study.<sup>5</sup> We just note here that the size of the unit cell,  $3 \times 3 \times 9 \text{ nm}$  is large enough to make the interactions between periodic images of the aqueous slabs negligible.<sup>6</sup>

## References

- (1) Lindahl, E.; Hess, B.; van der Spoel, D. *Journal of Molecular Modeling* **2001**, *7*, 306.
- (2) Miyamoto, S.; Kollman, P. A. *Journal of Computational Chemistry* **1992**, *13*, 952.
- (3) Berendsen, H. J. C.; Postma, J. P. M.; Vangunsteren, W. F.; Dinola, A.; Haak, J. R. *Journal of Chemical Physics* **1984**, *81*, 3684.
- (4) Essmann, U.; Perera, L.; Berkowitz, M. L.; Darden, T.; Lee, H.; Pedersen, L. G. *Journal of Chemical Physics* **1995**, *103*, 8577.
- (5) Horinek, D.; Herz, A.; Vrbka, L.; Sedlmeier, F.; Mamatkulov, S. I.; Netz, R. R. *Chemical Physics Letters* **2009**, *479*, 173.
- (6) Jungwirth, P.; Tobias, D. J. *Chemical Reviews* **2006**, *106*, 1259.
